# Supplementary material for: Varicose veins of lower extremities: Insights from the first large-scale genetic study
Source: PLoS Genet. 2019 Apr 18;15(4):e1008110. doi: 10.1371/journal.pgen.1008110 (PMC6490943; doi:10.1371/journal.pgen.1008110)
Supplement: S13 Table — (XLS) [file pgen.1008110.s019.xls]

## Sheet: 2SMR
Table S13. Results of hypothesis-free 2SMR analysis.
Traits that did not pass either 2SMR or the Steiger tests (before the incstruments filtration) are not shown.
Red color depicts the trait that did not pass the robustness analysis ("Tissue factor").
Details of the robustness analysis are given in Supplemental Methods (Section 7).
Leave-one-out and funnel plots for sensitivity analyses are provided in Figure S5.
Description of dataset/source see in Supplemental Methods (Section 6).																																								After removing the instrumental variables associated with VVs with P < 0.01 (in order to correct for horizontal pleiotropy - where necessary)
To see the resulting set of traits, scroll right ̶>																					Sensitivity analyses										Another 2SMR approaches (not included in the general analysis)
							2SMR: IVW approach			2SMR: MR-Egger approach			Steiger test			Robustness analysis					Assessing heterogeneity in causal effects amongst instruments				Horizontal pleiotropy test				Leave-one-out analysis_single instrument strongly drives the overall effect?	Funnel plot symmetrical?	Median-based estimator			Simple mode method			Mode-based method					2SMR: IVW approach			2SMR: MR-Egger approach			Trait passed 2SMR (summary conclusion)	Steiger test
Trait (exposure)	Trait group (our interpretation)	N cases	N controls	Total sample size	Dataset/source	Number of instrumental variables (SNPs)	beta	SE	P	beta	SE	P	SNPs_explained variance (exposure trait)	SNPs_explained variance (outcome trait = VVs)	P	Heterogeneity P_IVW approach	Robustness P_IVW approach	Heterogeneity P_MR-Egger approach	Robustness P_MR-Egger approach	Trait passed the test YES/NO (summary conclusion)	Q_IVW approach	Q_df_IVW approach	Heterogeneity P_IVW approach	Heterogeneity YES/NO (summary conclusion)	Intercept in MR Egger regression	SE	P	Horizontal pleiotropy YES/NO (summary conclusion)	YES/NO/NA (NA, not informative - too few or too many instruments to make a conclusion)	YES/NO/NA (NA, not informative - not enough instruments to make a conclusion)	beta	SE	P	beta	SE	P	beta	SE	P	Trait (exposure)	Number of instrumental variables (SNPs)	beta	SE	P	beta	SE	P	YES/NO/NA (NA, not enough instruments to perform the analysis)	SNPs_explained variance (exposure trait)
Standing height	Anthropometric trait	NA	NA	336474	The Neale Lab	633	0.0418416	0.00458488	7.10761e-20	0.0497492	0.0111943	1.04236e-05	0.196064	0.00297264	< 1E-22	0.479734	3.26115e-32	0.198692	1.97347e-07	YES	1071.14	632	3.55892e-25	YES	-0.000241476	0.000311839	0.439007	NO	NA	NO	0.0431737	0.00581044	1.08293e-13	0.0331343	0.0175914	0.0600844	0.0411146	0.0119241	0.000602191	Standing height	594	0.0375343	0.0039665	2.99779e-21	0.035379	0.00997116	0.000418723	YES	0.178918
Comparative height size at age 10	Anthropometric trait	NA	NA	332021	The Neale Lab	359	0.0657594	0.00688312	1.25127e-21	0.0547613	0.019222	0.00464152	0.0882595	0.00189455	< 1E-22	0.844596	9.33903e-38	0.806336	0.00035525	YES	614.92	358	7.49221e-16	YES	0.000291637	0.000475852	0.540351	NO	NA	NO	0.0614478	0.00859303	8.62192e-13	0.0590338	0.0251839	0.0196185	0.0562966	0.0177678	0.00166432	Comparative height size at age 10	331	0.0517855	0.00593785	2.75133e-18	0.0309207	0.0169874	0.0696358	YES	0.0789729
Leg fat-free mass (left)	Anthropometric trait	NA	NA	331258	The Neale Lab	376	0.0703324	0.00764386	3.54073e-20	0.0632106	0.0229435	0.00615515	0.0756132	0.00204831	< 1E-22	0.965596	2.8005e-22	0.519439	0.881736	YES	680.759	375	5.09757e-20	YES	0.000167369	0.000508309	0.742139	NO	NA	NO	0.0509446	0.0094895	7.9385e-08	0.0336839	0.0300376	0.262839	0.0336839	0.0182343	0.0654931	Leg fat-free mass (left)	350	0.0512731	0.00644112	1.71656e-15	0.0361125	0.0193651	0.0630475	YES	0.0694581
Whole body fat-free mass	Anthropometric trait	NA	NA	331291	The Neale Lab	414	0.0612195	0.00716468	1.28956e-17	0.050487	0.0210004	0.0166535	0.0896063	0.00225558	< 1E-22	0.940908	3.7686e-22	0.868494	0.919043	YES	781.036	413	5.16793e-25	YES	0.00026406	0.000485635	0.586913	NO	NA	NO	0.0519701	0.00831748	4.14928e-10	0.040314	0.0283426	0.15567	0.0370116	0.018191	0.0425283	Whole body fat-free mass	387	0.0477674	0.00600516	1.80005e-15	0.0335509	0.0177173	0.0590177	YES	0.0828439
Leg predicted mass (left)	Anthropometric trait	NA	NA	331253	The Neale Lab	373	0.0713218	0.00774879	3.44038e-20	0.0578087	0.0232563	0.0133683	0.0751843	0.00207989	< 1E-22	0.962721	6.94547e-22	0.58049	0.86356	YES	690.131	372	2.32893e-21	YES	0.000317801	0.000515635	0.538055	NO	NA	NO	0.0527976	0.00969032	5.07984e-08	0.0392488	0.0300972	0.193017	0.0339266	0.0182103	0.0632444	Leg predicted mass (left)	346	0.0512412	0.00647697	2.54757e-15	0.0324552	0.0194495	0.0960884	YES	0.0689
Basal metabolic rate	Anthropometric trait	NA	NA	331307	The Neale Lab	407	0.063329	0.00718189	1.16649e-18	0.0585201	0.0212345	0.00611755	0.0844289	0.00212438	< 1E-22	0.982371	2.58662e-27	0.492624	0.846651	YES	726.479	406	1.77868e-20	YES	0.000115057	0.000478041	0.809921	NO	NA	NO	0.0556177	0.00902619	7.19151e-10	0.0397505	0.0298675	0.183971	0.0362818	0.0182512	0.0474922	Basal metabolic rate	383	0.0480971	0.00614474	4.98214e-15	0.0396466	0.0182938	0.0308372	YES	0.0782599
Trunk fat mass	Anthropometric trait	NA	NA	331093	The Neale Lab	279	0.0744487	0.00934509	1.63089e-15	0.11909	0.0334831	0.000441562	0.0473432	0.00142306	< 1E-22	0.944779	5.22359e-24	0.680177	0.290719	YES	471.528	278	3.52605e-12	YES	-0.000941895	0.000678494	0.166187	NO	NO	NO	0.0564898	0.0118096	1.72359e-06	0.0438572	0.0406929	0.282075	0.0387942	0.0269969	0.151846	Trunk fat mass	258	0.0612115	0.00789798	9.16951e-15	0.0461137	0.0289566	0.112504	YES	0.0427126
Trunk fat-free mass	Anthropometric trait	NA	NA	331030	The Neale Lab	410	0.0516615	0.00725263	1.05502e-12	0.0518284	0.0214099	0.0159235	0.0924105	0.00225403	< 1E-22	0.999323	2.41032e-19	0.851173	0.272291	YES	817.091	409	1.94167e-29	YES	-4.20747e-06	0.000507769	0.993393	NO	NA	NO	0.0471695	0.00875436	7.11996e-08	0.0444906	0.0263807	0.0924658	0.0406275	0.0208499	0.0520298	Trunk fat-free mass	385	0.0447103	0.00593925	5.15466e-14	0.037977	0.0176586	0.0321316	YES	0.085879
Weight	Anthropometric trait	NA	NA	336227	The Neale Lab	349	0.0634723	0.00784331	5.84328e-16	0.0590316	0.0246744	0.017269	0.0644509	0.00165344	< 1E-22	0.999263	6.56611e-20	0.835115	0.351712	YES	566.77	348	1.05892e-12	YES	9.86655e-05	0.000519716	0.849542	NO	NA	NO	0.0463985	0.0107491	1.58509e-05	0.0364644	0.0329124	0.26866	0.0337154	0.0219263	0.125037	Weight	329	0.0510789	0.00680436	6.05929e-14	0.036328	0.021636	0.094097	YES	0.0591884
Whole body water mass	Anthropometric trait	NA	NA	331315	The Neale Lab	415	0.0568015	0.00716042	2.14422e-15	0.0538916	0.0210294	0.0107402	0.0893874	0.00220531	< 1E-22	0.992741	1.04569e-20	0.80513	0.868801	YES	780.059	414	8.99159e-25	YES	7.14675e-05	0.000485554	0.883056	NO	NA	NO	0.0521378	0.00884645	3.77775e-09	0.0519671	0.027524	0.0597159	0.0394881	0.0198103	0.0468834	Whole body water mass	389	0.0454778	0.00606064	6.19966e-14	0.0364581	0.0179051	0.0424122	YES	0.0827347
Leg predicted mass (right)	Anthropometric trait	NA	NA	331285	The Neale Lab	376	0.0720356	0.00777876	2.03382e-20	0.0628581	0.0233746	0.00748378	0.0758566	0.00213271	< 1E-22	0.952859	3.15191e-22	0.653381	0.87337	YES	707.125	375	1.09943e-22	YES	0.000217065	0.00052127	0.677345	NO	NA	NO	0.0509304	0.00935733	5.24399e-08	0.0287346	0.0307726	0.351022	0.0313314	0.019578	0.110366	Leg predicted mass (right)	350	0.0492039	0.00662162	1.0795e-13	0.0323101	0.0199008	0.105375	YES	0.0694553
Leg fat-free mass (right)	Anthropometric trait	NA	NA	331285	The Neale Lab	379	0.070667	0.00769758	4.29457e-20	0.0654808	0.0230316	0.00471103	0.0762121	0.00210556	< 1E-22	0.938377	9.65329e-22	0.835274	0.944283	YES	701.405	378	1.09715e-21	YES	0.000121954	0.000510372	0.811273	NO	NA	NO	0.050509	0.00995512	3.90211e-07	0.0288834	0.0303378	0.341676	0.0314896	0.0196367	0.109635	Leg fat-free mass (right)	353	0.047846	0.00651234	2.02732e-13	0.0401237	0.0195418	0.0407922	YES	0.0698174
Sitting height	Anthropometric trait	NA	NA	336172	The Neale Lab	462	0.0431347	0.006284	6.68615e-12	0.0553206	0.0171071	0.00130956	0.120386	0.00243633	< 1E-22	0.857836	1.53344e-25	0.770513	4.58786e-05	YES	900.935	461	9.52512e-31	YES	-0.000334177	0.000436304	0.444112	NO	NA	NO	0.0474425	0.0078388	1.42821e-09	0.085283	0.023869	0.00039014	0.0509359	0.0143561	0.000427891	Sitting height	433	0.0372404	0.00508772	2.48571e-13	0.0402231	0.0140828	0.004495	YES	0.11054
Trunk predicted mass	Anthropometric trait	NA	NA	330995	The Neale Lab	407	0.0518718	0.00725776	8.86415e-13	0.0512036	0.02144	0.017387	0.0917121	0.00222634	< 1E-22	0.997793	4.47027e-19	0.797128	0.195457	YES	805.779	406	1.17372e-28	YES	1.68372e-05	0.000508269	0.97359	NO	NA	NO	0.0468213	0.00833485	1.93705e-08	0.0436351	0.029733	0.142997	0.0398032	0.0198218	0.0452992	Trunk predicted mass	382	0.0435742	0.00600595	4.01156e-13	0.0401173	0.0178811	0.025436	YES	0.0852002
Arm fat-free mass (right)	Anthropometric trait	NA	NA	331221	The Neale Lab	356	0.0552006	0.00764997	5.3621e-13	0.0669821	0.0238013	0.00516279	0.0732596	0.00176073	< 1E-22	0.997092	5.10536e-23	0.789806	0.835418	YES	625.438	355	3.30681e-17	YES	-0.000280504	0.00053655	0.601446	NO	NA	NO	0.0526015	0.00962623	4.64508e-08	0.0409267	0.0308583	0.1856	0.0409267	0.0214156	0.0568004	Arm fat-free mass (right)	336	0.0468187	0.00663229	1.67457e-12	0.0409306	0.0207267	0.0491162	YES	0.0683456
Arm predicted mass (left)	Anthropometric trait	NA	NA	331146	The Neale Lab	364	0.0568438	0.00776832	2.52846e-13	0.0610294	0.0237625	0.0106201	0.0735483	0.00186419	< 1E-22	0.999717	9.04075e-23	0.713188	0.658899	YES	661.745	363	1.02393e-19	YES	-9.871e-05	0.000529515	0.852223	NO	NA	NO	0.0546701	0.00999501	4.50687e-08	0.0484308	0.0306666	0.115145	0.042008	0.0226963	0.065	Arm predicted mass (left)	340	0.0444087	0.00662878	2.09309e-11	0.0320433	0.0204331	0.117769	YES	0.0678359
Whole body fat mass	Anthropometric trait	NA	NA	330762	The Neale Lab	287	0.06559	0.00944275	3.75595e-12	0.0768868	0.0333986	0.0220504	0.0481591	0.00144822	< 1E-22	0.884154	1.28394e-16	0.272475	0.240284	YES	504.387	286	2.78045e-14	YES	-0.000236965	0.000671906	0.724592	NO	NO	NO	0.0548145	0.0121603	6.55439e-06	0.0656425	0.0379826	0.0850268	0.0408868	0.0251104	0.104567	Whole body fat mass	268	0.0539632	0.00810852	2.83056e-11	0.0450932	0.0287782	0.118322	YES	0.044079
Arm fat-free mass (left)	Anthropometric trait	NA	NA	331159	The Neale Lab	362	0.0563594	0.00782357	5.85564e-13	0.0560453	0.0239051	0.0195961	0.0732892	0.00186835	< 1E-22	0.999543	1.13859e-22	0.582863	0.572753	YES	665.389	361	2.3898e-20	YES	7.40029e-06	0.00053203	0.98891	NO	NA	NO	0.0537106	0.00960323	2.23217e-08	0.0454411	0.0304163	0.136056	0.0422314	0.0222116	0.0580563	Arm fat-free mass (left)	337	0.0432352	0.00667279	9.21343e-11	0.0270304	0.0205508	0.18931	YES	0.0674112
Hip circumference	Anthropometric trait	NA	NA	336601	The Neale Lab	270	0.072574	0.00937927	1.0123e-14	0.0761826	0.0328578	0.0211719	0.0474022	0.00138367	< 1E-22	0.991829	6.7648e-19	0.297215	0.216542	YES	460.569	269	3.06243e-12	YES	-7.69378e-05	0.000671304	0.908841	NO	NO	NO	0.0514167	0.0122168	2.56846e-05	0.0412438	0.0378521	0.276862	0.0366818	0.0245472	0.13626	Hip circumference	245	0.0499479	0.00773224	1.04921e-10	0.0309105	0.0271309	0.255697	YES	0.0418435
Arm predicted mass (right)	Anthropometric trait	NA	NA	331216	The Neale Lab	360	0.0525946	0.00779672	1.52254e-11	0.0715466	0.024106	0.00319914	0.0736001	0.00182591	< 1E-22	0.994986	1.75245e-24	0.69604	0.784171	YES	660.074	359	4.40505e-20	YES	-0.000447764	0.000538894	0.406587	NO	NA	YES	0.0490927	0.00963856	3.51767e-07	0.026588	0.0301231	0.378018	0.0359898	0.0209983	0.0874028	Arm predicted mass (right)	336	0.0424095	0.00662907	1.57937e-10	0.0460652	0.0205942	0.0259589	YES	0.0682339
Arm fat mass (left)	Anthropometric trait	NA	NA	331164	The Neale Lab	272	0.0607183	0.00967288	3.44794e-10	0.0434042	0.0330646	0.190395	0.0467688	0.00136978	< 1E-22	0.960994	2.44514e-11	0.678419	0.615698	YES	486.68	271	1.75788e-14	YES	0.000368653	0.000673133	0.584373	NO	NO	NO	0.0421977	0.0124157	0.00067695	0.056931	0.0386701	0.142122	0.042562	0.0232113	0.0677986	Arm fat mass (left)	255	0.0463889	0.00842223	3.63131e-08	0.0253063	0.0284234	0.374132	YES	0.043397
Arm fat mass (right)	Anthropometric trait	NA	NA	331226	The Neale Lab	282	0.0601346	0.0096066	3.8566e-10	0.038127	0.0329112	0.247655	0.047824	0.0014256	< 1E-22	0.93331	1.48223e-10	0.317188	0.27639	YES	509.226	281	2.12843e-15	YES	0.000465468	0.000665711	0.485005	NO	NO	NO	0.0456553	0.0124498	0.000245256	0.0611388	0.0385525	0.113896	0.0446184	0.0219774	0.0432782	Arm fat mass (right)	265	0.0464678	0.00844357	3.72672e-08	0.0218524	0.0286262	0.445927	YES	0.0445002
Leg fat mass (left)	Anthropometric trait	NA	NA	331275	The Neale Lab	276	0.0555547	0.0103718	8.49423e-08	0.0456242	0.0362865	0.209704	0.0467081	0.00153916	< 1E-22	0.940182	3.54447e-11	0.743876	0.409078	YES	567.228	275	1.88958e-22	YES	0.000208965	0.000731606	0.775381	NO	NO	NO	0.0466392	0.0123444	0.000157985	0.0724799	0.0373466	0.053312	0.0519409	0.0229423	0.0243545	Leg fat mass (left)	255	0.0466448	0.00858807	5.59297e-08	0.0526062	0.0299739	0.0804587	YES	0.0429162
Leg fat mass (right)	Anthropometric trait	NA	NA	331293	The Neale Lab	269	0.0560855	0.0104471	7.93754e-08	0.0367769	0.0367561	0.317942	0.0456628	0.00149162	< 1E-22	0.891438	3.66451e-09	0.791408	0.584466	YES	548.058	268	2.14257e-21	YES	0.000406805	0.000742376	0.584165	NO	NO	NO	0.0448515	0.0127124	0.000418455	0.0696261	0.0400957	0.0836252	0.0421937	0.0240889	0.0809901	Leg fat mass (right)	248	0.0462127	0.00853382	6.12065e-08	0.0356467	0.0297248	0.231596	YES	0.0417619
Forced vital capacity (FVC), Best measure	Pulmonary function	NA	NA	255492	The Neale Lab	177	0.069359	0.0109222	2.14932e-10	0.117047	0.0396438	0.0035853	0.0396895	0.00103303	< 1E-22	0.261765	1.86887e-35	0.980698	3.3803e-05	YES	341.35	176	1.13812e-12	YES	-0.00117602	0.00093993	0.21254	NO	NO	NO	0.0660904	0.012757	2.2102e-07	0.0491845	0.038863	0.207334	0.0859119	0.0321386	0.00822069	Forced vital capacity (FVC), Best measure	158	0.0457812	0.00872713	1.55567e-07	0.0780093	0.0336845	0.021867	YES	0.0345914
Trunk fat percentage	Anthropometric trait	NA	NA	331113	The Neale Lab	213	0.0746719	0.0116217	1.31704e-10	0.0988403	0.0462619	0.0337873	0.0354643	0.00122354	< 1E-22	0.959408	3.03383e-16	0.999915	0.352485	YES	416.347	212	1.96246e-15	YES	-0.000500825	0.000927806	0.589908	NO	NA	NO	0.0564538	0.013469	2.77251e-05	0.0376524	0.042247	0.373808	0.0376524	0.032136	0.242649	Trunk fat percentage	194	0.0486187	0.00940291	2.3334e-07	0.0161854	0.0383588	0.673536	YES	0.0312705
Waist circumference	Anthropometric trait	NA	NA	336639	The Neale Lab	199	0.0585397	0.0107746	5.53752e-08	0.0705932	0.0368676	0.0569698	0.0338414	0.000901453	< 1E-22	0.99631	7.43734e-15	0.864291	0.724181	YES	318.817	198	1.11026e-07	YES	-0.000255048	0.00074589	0.732763	NO	NA	NO	0.0361945	0.0139876	0.00966433	0.0422709	0.0406243	0.299362	0.0353833	0.026894	0.189811	Waist circumference	191	0.0459258	0.0100052	4.42802e-06	0.0458765	0.0339806	0.178605	YES	0.0321865
Arm fat percentage (right)	Anthropometric trait	NA	NA	331249	The Neale Lab	226	0.0550618	0.0108024	3.44727e-07	0.0549268	0.0412955	0.18484	0.0381751	0.0011274	< 1E-22	0.999971	4.23918e-09	0.998714	0.771422	YES	411	225	4.95582e-13	YES	2.82822e-06	0.000835137	0.997301	NO	NA	NO	0.0418926	0.014127	0.00302261	0.0534618	0.0410154	0.193751	0.0420694	0.026141	0.108948	Arm fat percentage (right)	211	0.0405455	0.00905371	7.52281e-06	0.0285101	0.0343094	0.406938	YES	0.0350348
MHC class I polypeptide-related sequence B	Plasma proteins	NA	NA	1000	Proteomics_SOMAscan	5	0.0208103	0.00237112	1.68533e-18	0.0146407	0.0216283	0.546976	0.357769	0.000189797	< 1E-22	0.978598	7.08611e-11	0.991086	8.34989e-10	YES	0.376286	4	0.984372	NO	0.00339986	0.0118469	0.792805	NO	NO	NA	0.0202352	0.00302636	2.28876e-11	0.020224	0.00403661	0.00743686	0.0198928	0.00378797	0.00629054	MHC class I polypeptide-related sequence B	2	0.0207658	0.00469035	9.54011e-06	NA	NA	NA	YES*	0.0841027
Forced vital capacity (FVC)	Pulmonary function	NA	NA	307638	The Neale Lab	198	0.074842	0.0123151	1.2224e-09	0.117633	0.0441395	0.00834006	0.0373517	0.00133723	< 1E-22	0.170758	1.24902e-39	0.857058	3.66969e-05	YES	457.653	197	8.59574e-23	YES	-0.000968432	0.000959294	0.313967	NO	NA	NO	0.0734172	0.0137808	9.95789e-08	0.0815661	0.0429445	0.0589813	0.11694	0.0377966	0.00226227	Forced vital capacity (FVC)	180	0.0418068	0.00967642	1.55686e-05	0.0995384	0.0365995	0.00718246	NO	0.0330729
Arm fat percentage (left)	Anthropometric trait	NA	NA	331198	The Neale Lab	236	0.0586398	0.0113513	2.39259e-07	0.0512406	0.0427057	0.23141	0.0394558	0.00134229	< 1E-22	0.999981	6.89769e-10	0.98779	0.81631	YES	490.272	235	4.14513e-20	YES	0.000153873	0.000856016	0.857501	NO	NA	NO	0.0454794	0.0137805	0.000965885	0.054836	0.0391373	0.162498	0.0426904	0.027917	0.127562	Arm fat percentage (left)	215	0.0357147	0.00916064	9.67061e-05	0.0372793	0.0341829	0.276688	NO	0.0357582
Impedance of leg (left)	Anthropometric trait	NA	NA	331296	The Neale Lab	309	-0.0617035	0.0105234	4.53311e-09	-0.123062	0.0320306	0.000148288	0.0590879	0.00225894	< 1E-22	0.835202	9.45883e-11	0.988843	0.0359504	YES	827.581	308	3.61099e-49	YES	0.00139685	0.000689129	0.0435279	NO	NA	NO	-0.0325242	0.0110358	0.00320703	-0.0323814	0.032025	0.312749	-0.0286596	0.0193373	0.139339	Impedance of leg (left)	291	-0.0280695	0.00720995	9.89451e-05	-0.0244557	0.0229843	0.288209	NO	0.0538985
Impedance of leg (right)	Anthropometric trait	NA	NA	331301	The Neale Lab	316	-0.0606907	0.01077	1.74885e-08	-0.128648	0.0338971	0.000176979	0.0593312	0.00240577	< 1E-22	0.84677	2.09144e-10	0.977913	0.0584608	YES	890.08	315	2.58451e-56	YES	0.00152954	0.000723843	0.0353828	NO	NA	NO	-0.0315792	0.0112218	0.00489128	-0.02255	0.0327189	0.491203	-0.026685	0.0204426	0.192723	Impedance of leg (right)	294	-0.0266628	0.00737482	0.000299901	-0.0386221	0.0240438	0.109285	NO	0.0539028
Forced expiratory volume in 1-second (FEV1), Best measure	Pulmonary function	NA	NA	255492	The Neale Lab	136	0.0674583	0.014534	3.46035e-06	0.0888568	0.0625958	0.158066	0.0285659	0.000952276	< 1E-22	0.996407	5.32258e-13	0.93583	0.39794	YES	332.968	135	9.74282e-19	YES	-0.000503826	0.00143327	0.725749	NO	NO	NO	0.0674641	0.0149242	6.17049e-06	0.0971721	0.0480326	0.0450431	0.0843108	0.0459279	0.0685997	Forced expiratory volume in 1-second (FEV1), Best measure	121	0.0325843	0.0108093	0.00257435	0.0426652	0.0474954	0.370838	NO	0.0253346
Forced expiratory volume in 1-second (FEV1)	Pulmonary function	NA	NA	307638	The Neale Lab	147	0.0701861	0.015505	5.99203e-06	0.13749	0.0640696	0.0335414	0.0266916	0.00107768	< 1E-22	0.999287	8.41476e-13	0.929161	0.0923174	YES	383.379	146	3.25706e-23	YES	-0.00147776	0.00136497	0.280772	NO	NO	NO	0.0699255	0.0167736	3.06214e-05	0.0820247	0.0514453	0.113008	0.0884161	0.0482534	0.0689402	Forced expiratory volume in 1-second (FEV1)	130	0.0289375	0.0120716	0.0165225	0.0918652	0.0511126	0.0746441	NO	0.0232787
Non-cancer illness code, self-reported: malabsorption/coeliac disease	Unclassified	1452	335707	337159	The Neale Lab	8	-0.128924	0.0159447	6.18064e-16	-0.152031	0.0355541	0.00522826	0.00968843	0.000179822	< 1E-22	0.693723	2.12746e-20	0.996781	6.58763e-18	YES	6.08909	7	0.529386	NO	0.00174363	0.00237655	0.490808	NO	NO	NA	-0.138391	0.0196041	1.67352e-12	-0.144681	0.0262964	0.000904669	-0.140313	0.0210537	0.00028665	Non-cancer illness code, self-reported: malabsorption/coeliac disease	3	-0.045239	0.045633	0.321507	-0.023964	0.118316	0.872779	NO*	0.00116613
CD209 antigen	Plasma proteins	NA	NA	1000	Proteomics_SOMAscan	2	0.0139371	0.00266492	1.69668e-07	NA	NA	NA	0.371876	6.70338e-05	< 1E-22	0.993266	0.000605752	1	0.000831546	YES	0	1	1	NO	-2147483648	-2147483648	1	NO	NA	NA	NA	NA	NA	NA	NA	NA	NA	NA	NA	CD209 antigen	0	NA	NA	NA	NA	NA	NA	NA*	NA
Tissue factor	Plasma proteins	NA	NA	3394	Protein biomarkers_Olink	2	-0.0793637	0.0148494	9.0633e-08	NA	NA	NA	0.0209187	6.99372e-05	1.77636e-15	0.0221411	0.520123	1	0.756276	NO	0	1	1	NO	-2147483648	-2147483648	1	NO	NA	NA	NA	NA	NA	NA	NA	NA	NA	NA	NA	Tissue factor	2	-0.0793637	0.0148494	9.0633e-08	NA	NA	NA	YES*	0.0209187
																																																*For these traits, correction for horizontal pleiitropy was not necessary
																																																(heterogeneity in causal effects amongst instruments was insignificant at the previous stage of analysis)
[truncated: 17 more columns]
